# Supplementary material for: Critical Role of Flavin and Glutathione in Complex I–Mediated Bioenergetic Failure in Brain Ischemia/Reperfusion Injury
Source: PubMed Central journal article supplement (PMC5916474; doi:10.1161/strokeaha.117.019687), 2018-04-11
Supplement: str-49-1223-s002.pdf [file str-49-1223-s002.pdf]

Over-reduction of mitochondrial complex I during brain ischemia results in a dissociation of reduced flavin (FMNH<sub>2</sub>) from the enzyme. Reperfusion-induced reoxidation of FMNH<sub>2</sub> by molecular oxygen is associated with generation of ROS and contributes to oxidative stress in the mitochondrial matrix. Recovery of complex I function at the early stage of reperfusion is followed by oxidation of critical thiol residue(s) at later stages.
